# Supplementary material
Source: PubMed Central journal article supplement (PMC2206573)

**A**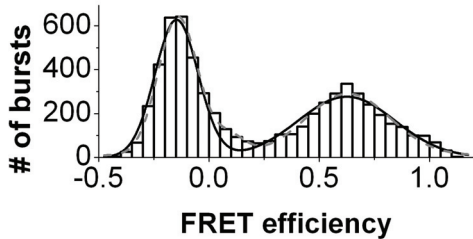**B**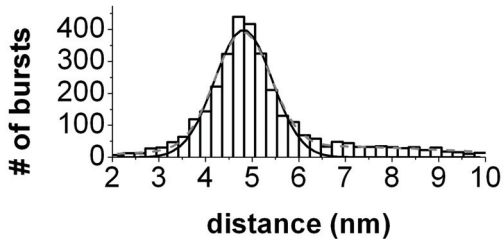

Supplement: pnas_0705488105_1.pdf [file pnas_0705488105_1.pdf]

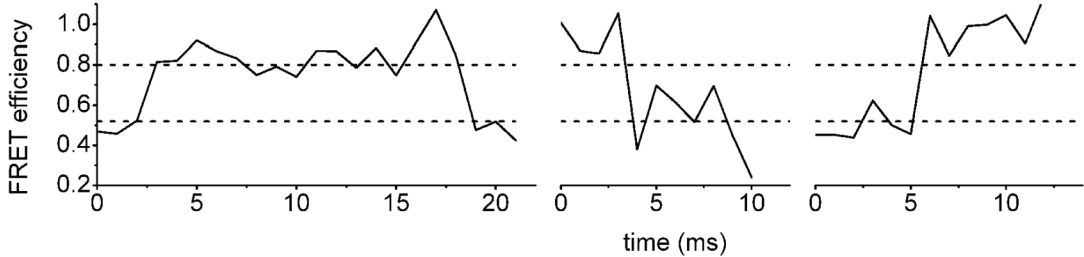

Supplement: pnas_0705488105_2.pdf [file pnas_0705488105_2.pdf]

**1 2 3 4**

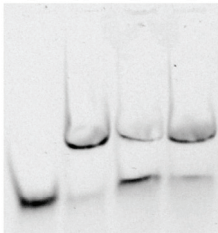

**100 15 72 36% ssRNA**

Supplement: pnas_0705488105_3.pdf [file pnas_0705488105_3.pdf]
